# Supplementary material
Source: publisher figshare collection journal article supplement (https://karger.figshare.com/ndownloader/files/31530512)
Supplement: Supplementary file 1 [file 31530512]

| **Supplemental Table S2. Odds ratio of a genetic etiology of hypernatremia in neonates with a recurrent hypernatremia onset age≥17.5 days** | | | | |
| --- | --- | --- | --- | --- |
| Onset age | Genetic etiology* | | **p-value** | **Odds ratio** |
| Yes | No |
| <17.5 day | 4 (57.1) | 20 (95.2) | 0.038 | 9.0  95% CI (1.1, 73.2) |
| ≥17.5 day | 3 (42.8) | 1 (4.8) |
| *case number (%) | | | | |
